# Supplementary material for: Roles of Hcp2, a Hallmark of T6SS2 in Motility, Adhesive Capacity, and Pathogenicity of Vibrio alginolyticus
Source: MDPI journal article supplement (doi:10.3390/microorganisms11122893), 2023-11-30
Supplement: s1 [file s1]

**Table S2. Sequences of primers used in this study**

| Primer            | Sequence (5'–3')                        | Targeting site                                             | Source or references |
|-------------------|-----------------------------------------|------------------------------------------------------------|----------------------|
| <i>hcp2</i> -MF1  | GGAATCTAGACCTTGAGTCGGAACA               | Upstream of <i>hcp2</i>                                    | This study           |
|                   | CAGGGACCGAAACGACGATG                    |                                                            |                      |
| <i>Hcp2</i> -MR1  | GACCTTTAACACCGCTGTAGCCCTC               |                                                            |                      |
|                   | GGCTGTTGCCTCACCCCT                      |                                                            |                      |
| <i>hcp2</i> -MF2  | AGGGTGAGGCAACAGCCGAGGGCT                | Downstream of <i>hcp2</i>                                  | This study           |
|                   | ACAGCGGTGTTAAAGGTC                      |                                                            |                      |
| <i>hcp2</i> -MR2  | ACAGCTAGCGACGATATGTCGCGTA               |                                                            |                      |
|                   | TGGGCAGACTTAGTATGTG                     |                                                            |                      |
| pLP-UF            | GACACAGTTGTAACTGGTCCA                   | Recombinant plasmid pLP12 with <i>hcp2</i> fusion fragment | This study           |
| pLP-UR            | CAGGAACACTTAACGGCTGAC                   |                                                            |                      |
| <i>hcp2</i> -TF   | CACTATTATTATTATGACCGC                   | Genomic <i>hcp2</i>                                        | This study           |
| <i>hcp2</i> -TR   | GTCAGAATTTGCGTTTCATGCC                  |                                                            |                      |
| <i>comhcp2</i> -F | TGCActgcagATGCAGTCTAATACGTAT CTT (pstI) | <i>hcp2</i> cds                                            | This study           |
| <i>comhcp2</i> -R | CCGctcgagTTACATTTGTTGACCTTTA AC (xhoI)  |                                                            |                      |
| RT-qPCR           |                                         |                                                            |                      |
| <i>hcp2</i> -qF   | TCTGTAGATTGGAGTGTAGGT                   | <i>hcp2</i> cds                                            | This study           |
| <i>hcp2</i> -qR   | AACGGTCTTGAAGTTTAGTG                    |                                                            |                      |
| <i>flaA</i> -qF   | AGCGTTTGTCTTCGGGTTA                     | <i>flaA</i> cds                                            | This study           |
| <i>flaA</i> -qR   | GCTACACGTTCTGCTTTTG                     |                                                            |                      |
| <i>flaB</i> -qF   | CGTTTGTCTTCAGGTTTT                      | <i>flaB</i> cds                                            | This study           |
| <i>flaB</i> -qR   | GTTGCGAACTGCTACATC                      |                                                            |                      |
| <i>flaC</i> -qF   | ACTTCATTTGGTGGTCGT                      | <i>flaC</i> cds                                            | This study           |
| <i>flaC</i> -qR   | AACATTGCCGCTTCGTC                       |                                                            |                      |
| <i>flgE</i> -qF   | ACGACGAGTTCTTGTTAGGTT                   | <i>flgE</i> cds                                            | This study           |
| <i>flgE</i> -qR   | AGAGGTTGAACGGTTGTATGT                   |                                                            |                      |
| <i>fliH</i> -qF   | TTATCAAGAAGGCTTACATC                    | <i>fliH</i> cds                                            | This study           |
| <i>fliH</i> -qR   | AGCATTCATCAACTCCAA                      |                                                            |                      |
| <i>fliF</i> -qF   | CAAGAAGCGTCTGCGTCGGTAT                  | <i>fliF</i> cds                                            | This study           |
| <i>fliF</i> -qR   | CTGAGCTGAGTAAGCGGCCATG                  |                                                            |                      |
| <i>rpoN</i> -qF   | AGGCAACCGTGA CTACAA                     | <i>rpoN</i> cds                                            | This study           |
| <i>rpoN</i> -qR   | AGGAGTGATGCGACTACC                      |                                                            |                      |
| <i>rpoS</i> -qF   | TCTCACCTTTACTTACTGCC                    | <i>rpoS</i> cds                                            | This study           |
| <i>rpoS</i> -qR   | CTCGCTCTATCGTTTGTC                      |                                                            |                      |
| <i>fliA</i> -qF   | GAAGTAGCCACGCATCTC                      | <i>fliA</i> cds                                            | This study           |
| <i>fliA</i> -qR   | CTGTCATCGGTTTCATCC                      |                                                            |                      |
| <i>fliA</i> -qF   | CGTTTTCCTTTGCCTGTT                      | <i>fliA</i> cds                                            | This study           |
| <i>fliA</i> -qR   | TTTGCTTCCGTGTTTGAT                      |                                                            |                      |

|                   |                      |                    |            |
|-------------------|----------------------|--------------------|------------|
| <i>flrB</i> -qF   | ATCCAGGCGGTGTTTGAC   | <i>flrB</i> cds    | This study |
| <i>flrB</i> -qR   | CAGCGGCGTTCTTACTTG   |                    |            |
| <i>flrC</i> -qF   | CGACCGTTGCGTTAGAAA   | <i>flrC</i> cds    | This study |
| <i>flrC</i> -qR   | TACTGGGCGGCTGACACT   |                    |            |
| <i>16SrRNA</i> -F | TTGCGAGAGTGAGCGAATCC | <i>16SrRNA</i> cds | This study |
| <i>16SrRNA</i> -R | ATGGTGTGACGGGCGGTGTG |                    |            |
