# Supplementary material for: Roles of Hcp2, a Hallmark of T6SS2 in Motility, Adhesive Capacity, and Pathogenicity of Vibrio alginolyticus
Source: MDPI journal article supplement (doi:10.3390/microorganisms11122893), 2023-11-30
Supplement: s1 [file s1]

**Table S1. Plasmids and bacterial strains used in this study**

| Strains and plasmids                          | Genotype and relevant characteristics                                                                                                                                                    | Source or references |
|-----------------------------------------------|------------------------------------------------------------------------------------------------------------------------------------------------------------------------------------------|----------------------|
| E. coli strains                               |                                                                                                                                                                                          |                      |
| DH5 $\alpha$                                  | F- $\phi$ 80d <i>lacZ</i> $\Delta$ M15 $\Delta$ ( <i>lacZYA-argF</i> ) U169 <i>recA1 end A1 hsdR17</i> (rk-, mk+) <i>phoA</i> , <i>supE44</i> $\lambda$ - <i>thi-1 gyrA96 relA1 phoA</i> | TransGen Biotech     |
| $\beta$ 2163                                  | F-, RP4-2-Tc::Mu $\Delta$ dapA::(erm-pir)                                                                                                                                                | Demarre et al., 2005 |
| S17-1 $\lambda$ pir                           | Tpr Smr <i>recA thi pro hsdR</i> -M+RP4:2-Tc: Mu:Km Tn7 $\lambda$ pir                                                                                                                    | Simon et al., 1983   |
| S17-1-pBBR1-MCS1- <i>hcp2</i>                 | S17-1 containing plasmid of pBBR1-MCS1- <i>hcp2</i> , Cmr                                                                                                                                | This study           |
| <i>Vibrio aginolyticus</i>                    |                                                                                                                                                                                          |                      |
| HY9901                                        | Wild-type, isolated from the diseased fish                                                                                                                                               | Cai et al., 2007     |
| $\Delta$ <i>hcp2</i>                          | HY9901 carrying an in-frame deletion of <i>hcp2</i>                                                                                                                                      | This study           |
| HY9901-pBBR1-MCS1                             | HY9901 containing plasmid of pBBR1-MCS1, Cmr (HY9901-ev)                                                                                                                                 | This study           |
| $\Delta$ <i>hcp2</i> -pBBR1-MCS1              | HY9901 $\Delta$ <i>hcp2</i> containing plasmid of pBBR1-MCS1, Cmr ( $\Delta$ <i>hcp2</i> -ev)                                                                                            | This study           |
| $\Delta$ <i>hcp2</i> -pBBR1-MCS1- <i>hcp2</i> | HY9901 $\Delta$ <i>hcp2</i> containing plasmid of pBBR1-MCS1- <i>hcp2</i> , Cmr ( $\Delta$ <i>hcp2</i> -com)                                                                             | This study           |
| Plasmids                                      |                                                                                                                                                                                          |                      |
| pMD19-T                                       | Cloning vector; Amp <sup>r</sup>                                                                                                                                                         | TaKaRa               |
| pBBR1-MCS1                                    | Expression vector; pBBR1 Rep, pBBR1 oriV; Cmr                                                                                                                                            | Kovach et al., 1995  |
| pLP12                                         | oriTRP4 oriVR6Kvmi480 PBAD, Cmr                                                                                                                                                          | Luo et al., 2015     |
| pLP12- <i>hcp2</i>                            | pLP12 derivative containing homologous arms of <i>hcp2</i>                                                                                                                               | This study           |
